# Supplementary material
Source: HighWire-hosted journal article supplement (https://gut.bmj.com/content/gutjnl-2021-326350)
Supplement: inline-supplementary-material-1 [file inline-supplementary-material-1.pdf]

## Supplementary Materials and methods

### Isolation of mononuclear cells from peripheral blood and tissues

Peripheral leukocytes were isolated by Ficoll density gradient centrifugation. Thereafter, the mononuclear cells were washed and resuspended in RPMI 1640 supplemented with 10% FBS. Monocytes/macrophages and T cells were purified from the leukocytes using a MACS column purification system (Miltenyi Biotec). Human CD8<sup>+</sup> T cells, PD-L1<sup>+</sup> and PD-L1<sup>-</sup> monocytes/macrophages, HLA-DR<sup>high</sup> and HLA-DR<sup>low</sup> monocytes/macrophages, as well as mouse F4/80<sup>+</sup> macrophages and CD8<sup>+</sup> T cells were further sorted by FACS (MoFlo, Beckman Coulter). These cells were used in subsequent experiments.

### Animal experiments

All mice were maintained under specific pathogen-free conditions in the animal facilities of the First Affiliated Hospital of Nanjing Medical. All mice were randomly grouped. Animal experiments were performed with the approval of the Institutional Animal Care and Use Committee of the First Affiliated Hospital of Nanjing Medical.  $1 \times 10^6$  mouse hepatoma Hepa1-6 cells in 25  $\mu$ l of Matrigel (Corning) were injected under the hepatic capsule of 5–7-week-old female C57/BL6 mice. In some experiments, Hepa1-6 cells were pre-transfected with shNC or sh*Fnl* by lentiviral vectors delivery system. The detailed procedures of the animal experiments are shown in figure 1J, figure 4C, and figure 7L.

### Immunohistochemistry and immunofluorescence

Paraffin-embedded and formalin-fixed samples were cut into 5- $\mu$ m sections, followed by procedures for immunohistochemistry. After incubation with primary antibody against human CD68, PD-L1, HLA-DR, and PKM2, sections were stained with corresponding secondary antibodies and visualized in an Envision System. For immunofluorescence analysis of patient samples, frozen sections were initially incubated with mouse anti-human CD68 and rabbit anti-human PD-L1; or mouse anti-human CD68, rabbit anti-human PKM2 and rabbit anti-human PD-L1. Thereafter, sections were stained with Alexa Fluor 488-conjugated donkey anti-rabbit IgG and Alexa Fluor 555-conjugated donkey anti-mouse IgG (Invitrogen); or Alexa Fluor 488-conjugated donkey anti-mouse IgG, Alexa Fluor 555-conjugated donkey anti-rabbit IgG, and Cyanine 5-conjugated streptavidin detect biotinylated corresponding secondary antibodies anti-

rabbit IgG. Nuclei were counterstained with DAPI. Immunofluorescence staining images were visualized by confocal microscopy (LSM 880, AxioObserver; Carl Zeiss, Oberkochen, Germany).

### **Evaluation of immunohistochemical variables**

Analysis was performed by two independent observers who were blinded to the clinical outcomes. At low-power field ( $\times 100$ ), the tissue sections were screened, and the 5 most representative fields were selected using a Leica DM IRB inverted research microscope (Leica, Wetzlar, Germany). For evaluating the density of tissue-infiltrating CD68<sup>+</sup>PKM2<sup>+</sup> cells, the respective areas of HCC tissues were then scanned at  $\times 400$  magnification (0.146 mm<sup>2</sup> per field). The number of nucleated PKM2<sup>high</sup> cells in each area was then counted manually and expressed as cells per field. The PKM2<sup>high</sup> cells that were negative for CD68 were excluded from counting. Positively stained cells that are smaller than the size of circulating monocytes/macrophages (15  $\mu$ m) were excluded from counting. There was a significant linear correlation between the counting data of two independent observers ( $P = 2.77 \times 10^{-24}$ ), and the average of counts by 2 investigators was applied in the following analysis to minimize interobserver variability.

### **Flow cytometry (FACS)**

Monocytes/macrophages and T cells from peripheral blood, tissues, or ex vivo culture were stained with fluorochrome-conjugated antibodies and then analyzed by FACS. In some cases, T cells from ex vivo culture system were stimulated with Leukocyte Activation Cocktail (BD Bioscience) at 37°C for 5 hours. Thereafter, the cells were stained with surface markers, fixed and permeabilized with IntraPrep reagent (Beckman Coulter), and finally stained with intracellular markers. Data were acquired using a Gallios flow cytometer (Beckman Coulter).

### **Real-time polymerase chain reaction (PCR)**

Trizol reagent (Invitrogen) was used to isolate total RNA of cells or tissue. Aliquots (2  $\mu$ g) of the RNA were reverse-transcribed using MMLV reverse transcriptase. The PCR was performed in triplicate using Hieff qPCR SYBR Green Master Mix in a Roche LightCycler 480 System.

### **Immunoblotting**

Monocytes/macrophages from in vitro culture system were washed three times with PBS and

the pellets were resuspended in lysis buffer for 20 minutes on ice. After centrifugation at 10,000 g for 10 minutes, the supernatants were dissolved in Laemmli sample buffer and heated at 95 °C for 5 minutes. Equal amount of cellular proteins was separated on 10% SDS–polyacrylamide gel electrophoresis and electrotransferred to nitrocellulose membranes. The membranes were blocked with 3% bovine serum albumin, and the presence of indicated protein on the blots was detected with specific antibodies and commercial ECL kit.

### **Glucose uptake assay**

Purified monocytes/macrophages were starved of glucose by incubation for 1 hour in PBS and then stained with 2-NBDG for 30 minutes at 37 °C and subjected to FACS analysis.

### **Extracellular acidification (ECAR) analyses**

Measurement of the ECAR of monocytes/macrophages was done using an XF-24 Extracellular Flux Analyzer (Seahorse Bioscience). HLA-DR<sup>high</sup> and HLA-DR<sup>low</sup> monocytes/macrophages isolated from tissue or macrophages cultured in vitro were suspended in XF Base Medium Minimal DMEM (pH 7.4) with L-Glutamine (2 mM) and then placed on a cell culture microplate (2 × 10<sup>5</sup> cells/well; XF-24, Seahorse Bioscience). Glucose (10 mM), oligomycin A (1 μM), and 2-DG (50 mM) were added to the cells during performing real-time measurement of the ECAR.

### **Lactate assay**

The supernatants of monocytes/macrophages were collected from ex vivo or in vitro culture systems. Concentrations of the lactate in the supernatants were detected using L-lactate assay kit according to the manufacturers' instructions (Eton bioscience).

### **In vitro and ex vivo culture of monocytes/macrophages**

Monocytes/macrophages, PD-L1<sup>+</sup> or HLA-DR<sup>high</sup> monocytes/macrophages isolated from HCC tissues were left untreated or treated with 2-DG (25 mM), oligomycin (Oym, 0.5 μM), etomoxir (ETO, 50 μM), or with neutralizing antibodies against human TNF-α (10 μg/ml), IL-1β (10 μg/ml), IL-6 (40 μg/ml), IL-12 (10 μg/ml). In some experiments, purified monocytes from human blood were untreated or treated with human recombinant TNF-α (20 ng/ml), IL-1β (10 ng/ml), IL-6 (40 ng/ml), IL-12 (10 ng/ml), or with 30% primary liver-SN or primary HCC-SN,

or FN1 (20 µg/ml) in the presence or absence of 2-DG, 3-PO (30 nM), 3-BP (20 nM), ML-265 (50 µM),  $\alpha$ -KG (20 µg/mL), WP1066 (1 µg/ml), or antibody against TLR-4 (20 µg/ml). In other experiments, monocytes were pre-transfected with 300 nM negative control siRNA, or PKM2-specific siRNA (sense: 5'-CCU GUA UGU CAA UAAACAACA-3'; antisense: 5'-UUG UUU AUU GAC AUA CAG GUA-3') using P3 primary cell 4D-Nucleofector X kit (V4XP-3024, Lonza) before exposure to HCC-SN. All siRNA duplexes were purchased from GenePharma.

### **Ex vivo T cell culture system**

CD8<sup>+</sup> T cells, PD-L1<sup>-</sup> and PD-L1<sup>+</sup> monocytes/macrophages were isolated from human HCC tumors by FACS-sorting. PD-L1<sup>+</sup> monocytes/macrophages were pretreated with glycolysis inhibitor 2-DG for 24 hours. Thereafter,  $1 \times 10^5$  T cells were left untreated or were cultured with autologous PD-L1<sup>-</sup> or PD-L1<sup>+</sup> monocytes/macrophages (5:1) in the presence or absence of a specific blocking antibody against PD-L1 (20 µg/mL) for 20 hours. Meanwhile, 25 µg/ml of tumor mass lysates were added to trigger tumor specific T cell response. In some cases, T cells and PD-L1<sup>+</sup> monocytes/macrophages were cocultured with specific blocking antibodies against IL-12 (10 µg/mL) or HLA-DR (20 µg/mL) in the presence of PD-L1 blocking antibody.

### **Enzyme-linked immunospot assay (ELISpot)**

ELISpot assays were performed using commercial kits (BD Bioscience) according to the manufacturer's instructions. In brief, 96-well nitrocellulose plates (Millipore) were coated with 5 µg/ml anti-human IFN- $\gamma$  capture antibody at 4°C overnight. The wells were then washed and blocked for 2 hours at room temperature with 10% FBS-RPMI 1640 medium.  $1 \times 10^5$  purified CD8<sup>+</sup> T cells from human HCC tissues were left untreated or were cultured with autologous monocytes/macrophages for 20 hours in the plate. After wash, the plates were incubated with 2 µg/ml of biotinylated anti-human IFN- $\gamma$  detection antibody and developed with streptavidin-horseradish peroxidase, followed by the addition of 3-amino-9-ethylcarbazole substrate reagent. In some experiments, Mock or PD-L1 HEK293T transfectants were primary pretreated with 10 µg/mL mitomycin C for 20 minutes to abolish the growth or cytokine production activity of cells. Thereafter, purified CD8<sup>+</sup> T cells were left untreated or cultured for 24 hours with indicated mitomycin C-treated cells in the presence or absence of 10 ng/mL human recombinant IL-12 antibody (eBioscience). The production of IFN- $\gamma$  by tumor CD8<sup>+</sup> T cells

was determined by ELISpot Assay. The images were scanned with an ELISpot reader (CTL), and spot numbers were counted manually.

#### **Ex vivo tumor-specific T cell cytotoxicity assay**

CD8<sup>+</sup> T cells and macrophages were isolated from mice Hepa1-6 tumors. Macrophages were pretreated with glycolysis inhibitor 2-DG for 24 hours.  $1 \times 10^5$  CD8<sup>+</sup> T cells were left untreated or were cultured with autologous macrophages and CFSE-labelled Hepa1-6 cells (10:2:1) in the presence or absence of a specific blocking antibody against PD-L1 (20 µg/mL) for 12 hours. Meanwhile, 25 µg/ml of tumor mass lysates were added to trigger tumor specific T cell response. Propidium iodide<sup>+</sup> apoptotic tumor cells were analyzed by flow cytometry.

#### **Enzyme-linked immunosorbent assay (ELISA)**

Concentrations of the cytokines TNF- $\alpha$ , IL-1 $\beta$ , IL-6, and IL-12p70 in the supernatants from in vitro or ex vivo culture systems were detected using ELISA kits according to the manufacturers' instructions (eBioscience).

#### **Preparation of culture supernatant from primary tumors**

Culture supernatants were acquired by culture of completely digested HCC tumor. All specimens were from individuals without concurrent autoimmune disease, HBV, HCV, HIV, or syphilis. The digested tumor or liver cells were washed in medium containing polymyxin B (20 µg/mL; Sigma-Aldrich) to exclude endotoxin contamination. Thereafter,  $1 \times 10^7$  digested cells were resuspended in 10 mL of complete medium and cultured in 100-mm dishes. In some experiments, Huh7 cells were pre-transfected with shNC or shFN1 by lentiviral vectors delivery system. Tumor culture supernatants were prepared by plating  $5 \times 10^6$  tumor cells in 10 mL complete medium in 100-mm dishes. After 2 days, the supernatants were harvested, centrifuged, and stored at  $-80^\circ\text{C}$ .

#### **Construction of PD-L1 stable cell lines**

The PD-L1 gene was amplified by PCR from human cDNA and confirmed by DNA sequencing. The gene fragment was inserted into retrovirus vector pBABE-puro and cotransfected into the package cell HEK293T with helper virus vector pBABE-ampho in the context of Lipofectamine (Invitrogen). The supernatant of these HEK293T cells was used to infect original HEK293T

cells. The cell lines stably expressing PD-L1 and the mock transfectant were selected with puromycin (1  $\mu\text{g}/\text{mL}$ , Sigma-Aldrich).

## Supplementary Tables

Table S1. Clinical characteristics of HCC patients

| Patients characteristics                                                | Cohort 1         | Cohort 2        |
|-------------------------------------------------------------------------|------------------|-----------------|
| No. of patients                                                         | 91               | 93              |
| Age, years (median, range)                                              | 51, 19–81        | 50.7, 27–78     |
| Gender (male: female)                                                   | 76:15            | 71:22           |
| HBsAg (negative: positive)                                              | 14:77            | 23:70           |
| Cirrhosis (absent: present)                                             | 24:67            | 28:65           |
| ALT, U/L (median, range)                                                | 41.4, 12.3–533.7 | 39.4, 9.9–453.7 |
| AFP, ng/ml ( $\leq 25$ : $> 25$ )                                       | 43:48            | 47:46           |
| Tumor size, cm ( $\leq 5$ : $> 5$ )                                     | 37:54            | 38:55           |
| Tumor multiplicity (solitary: multiple)                                 | 71:20            | 71:22           |
| Vascular invasion (absent: present)                                     | 63:28            | 64:29           |
| TNM stage (I+II: III+IV)                                                | 43:48            | 63:30           |
| Tumor differentiation (I+II: III+IV)                                    | 62:29            | 58:35           |
| Fibrous capsule (absent: present)                                       | 35:56            | 39:54           |
| Tumor PKM2 <sup>+</sup> CD68 <sup>+</sup> cells density (median, range) | 90, 26–211       | N/A             |

**Abbreviations:** HBsAg, hepatitis B surface antigen; AFP, alpha fetoprotein; ALT, alanine aminotransferase; TNM, tumor-node-metastasis; N/A, not applicable.

**Note:** Patients in cohort 1 contributed to the paraffin embedded samples for immunohistochemical staining that were used in analyses of cell distribution, correlation, and patient prognosis; patients in cohort 2 contributed fresh samples.

**Table S2.** Fluorochrome-conjugated antibodies used in flow cytometry

| <b>Antibody</b>                                        | <b>Supplier</b> | <b>Catalogue</b> | <b>RRID</b> |
|--------------------------------------------------------|-----------------|------------------|-------------|
| Anti-Human CD14 Antibody, AF 700, Clone M5E2           | BD Biosciences  | 557923           | AB_396944   |
| Anti-Human CD23 Antibody, APC Conjugated, Clone M-L233 | BD Biosciences  | 558690           | AB_1645456  |
| Anti-Human CD3 Antibody, AF 700, Clone OKT3            | eBioscience     | 56-0037-42       | AB_10714978 |
| Anti-Human CD15 Antibody, eFluor 450, Clone MMA        | eBioscience     | 48-0158-42       | AB_1907348  |
| Anti-Human CD19 Antibody, PE-CY7, Clone J4.119         | Beckman Coulter | PM IM 3628U      | NA          |
| Anti-Human CD56 Antibody, PE-CY7, Clone N901           | Beckman Coulter | A21692           | AB_2892144  |
| Anti-Human CD45 Antibody, KO, Clone J.33               | Beckman Coulter | PN A96416        | NA          |
| Anti-Human CD86 Antibody, PE, Clone HA5.2B7            | Beckman Coulter | IM2729U          | NA          |
| Anti-Human CD163 Antibody, PE, Clone GHI/61            | eBioscience     | 12-1639-42       | AB_1963570  |
| Anti-Human CD206 Antibody, PE/Cy7, Clone 15-2          | Biolegend       | 321124           | AB_10933248 |
| Anti-Human CD274 (PD-L1) Antibody, PE, Clone MIH1      | eBioscience     | 12-5983-42       | AB_11042286 |
| Anti-Human CD274 (PD-L1) Antibody, PE-Cy7, Clone MIH1  | BD Biosciences  | 558017           | AB_396986   |
| Anti-Human Glut1 Antibody, APC, Clone 202915           | BD Biosciences  | FAB1418A         | AB_1207948  |
| Anti-Human HLA-DR Antibody, PE-CF594, Clone G46-6      | BD Biosciences  | 562304           | AB_11154415 |
| Anti-Mouse CD3 Antibody, AF 700, Clone 17A2            | eBioscience     | 56-0032-82       | AB_529507   |
| Anti-Mouse CD8a Antibody, FITC, Clone 53-6.7           | Invitrogen      | 11-0081-82       | AB_464915   |
| Anti-Mouse CD45 Antibody, BV 570, Clone 30-F11         | Biolegend       | 103136           | AB_2562612  |



---

| <b>Antibody</b>                                              | <b>Supplier</b> | <b>Catalogue</b> | <b>RRID</b> |
|--------------------------------------------------------------|-----------------|------------------|-------------|
| Anti-Mouse CD86 Antibody, FITC, Clone GL-1                   | Biolegend       | 105005           | AB_313148   |
| Anti-Mouse CD274 Antibody, PE/Cyanine7, Clone 10F-9G2        | Biolegend       | 124314           | AB_10643573 |
| Anti-Mouse F4/80 Antibody, APC, Clone BM8                    | Biolegend       | 123116           | AB_893481   |
| Anti-Mouse I-A/I-E Antibody, PE/Cyanine7, Clone M5/114.115.2 | Biolegend       | 107629           | AB_2290801  |
| Anti-Mouse IFN- $\gamma$ Antibody, ef450, Clone XMG1.2       | eBioscience     | 48-7311-82       | AB_1834366  |

---

**Table S3.** Antibodies for immunoblotting, IHC, and IF

| <b>Antibody</b>                         | <b>Supplier</b>           | <b>Identifier</b>                 |
|-----------------------------------------|---------------------------|-----------------------------------|
| <b>Antibodies for IHC/IF</b>            |                           |                                   |
| Anti-Human CD68 Antibody (PG-M1)        | ZSBio                     | Cat# ZM-0464                      |
| Anti-Human CD8 Antibody                 | ZSBio                     | Cat# ZA-0508                      |
| Anti-Human HLA-DR Antibody (L243)       | Biologend                 | Cat# 307602; RRID:AB_314680       |
| Anti-Human PD-L1 Antibody (E1L3N)       | Cell Signaling Technology | Cat# 13684; RRID:AB_2687655       |
| Anti-Human PKM2 Antibody (D78A4)        | Cell Signaling Technology | Cat# 4053; RRID:AB_1904096        |
| Cy 5-streptavidin                       | Invitrogen                | Cat# 43-4316                      |
| <b>Antibodies for immunoblotting</b>    |                           |                                   |
| Mouse Anti-Human HIF-1 $\alpha$         | BD Biosciences            | Cat# 610958; RRID:AB_398271       |
| Rabbit Anti-Human HK2 (C64G5)           | Cell Signaling Technology | Cat# 2867; RRID:AB_2232946        |
| Rabbit Anti-Human LDHA Antibody         | Proteintech               | Cat# 19987-1-AP; RRID:AB_10646429 |
| Rabbit Anti-Human PFKFB3                | Proteintech               | Cat# 13763-1-AP; RRID:AB_2162854  |
| Rabbit Anti-Human PKM2                  | Cell Signaling Technology | Cat# 4053; RRID:AB_1904096        |
| Rabbit Anti-Human Stat3 (Tyr705) (D3A7) | Cell Signaling Technology | Cat# 9145; RRID:AB_2491009        |
| Mouse Anti-Stat3 Antibody (124H6)       | Cell Signaling Technology | Cat# 9139; RRID:AB_331757         |
| $\beta$ -Actin (ACTB) Antibody (8H10)   | Origene                   | Cat# TA310155; RRID:AB_10691552   |

**Table S4.** Primers for real-time PCR

| Gene                          | Forward                 | Reverse                  |
|-------------------------------|-------------------------|--------------------------|
| <b>Primers for human gene</b> |                         |                          |
| <i>IL6</i>                    | TCAGCCCTGAGAAAGGAGACA   | GATTTTCACCAGGCAAGTCTCC   |
| <i>TNF</i>                    | AAGCCTGTAGCCCATGTTG     | TGGTAGGAGACGGCGATG       |
| <i>IL1B</i>                   | CGAATCTCCGACCACCACTAC   | GATGAAGGGAAAGAAGGTGCTC   |
| <i>IL12A</i>                  | GCTTCTTCATCAGGGACATCATC | GTCAGGGAGAAGTAGGAATGTGG  |
| <i>HK1</i>                    | CGAGAGTGACCGATTAGCACT   | AGACAGGAGGAAGGACACGTT    |
| <i>HK2</i>                    | GATTGTCCGTAACATTCTCATCG | CAGGCAGTCACTCTCAATCTGAG  |
| <i>PFKFB3</i>                 | CTCGCATCAACAGCTTTGAGG   | TCAGTGTTTCCTGGAGGAGTC    |
| <i>ALDOA</i>                  | AGATGAGTCCACTGGGAGCAT   | AGATGAGTCCACTGGGAGCAT    |
| <i>GAPDH</i>                  | GGAGTCAACGGATTTGGTCGT   | TCTCGCTCCTGGAAGATGGT     |
| <i>PGK1</i>                   | GGGTCGTTATGAGAGTCGACT   | AGGTGGCTCATAAGGACTACC    |
| <i>ENO2</i>                   | AACAGTGAAGCCTTGGAGCTG   | TCCTCAATGGAGACCACAGGA    |
| <i>PKM</i>                    | TCTGTACCATTGGCCCAGCTT   | TGGCTGTGCGCACATTCTTGA    |
| <i>LDHA</i>                   | GATTCCAGTGTGCCTGTATGG   | CTACAGAGAGTCCAATAGCCC    |
| <i>CS</i>                     | GGGCTGCAAGAACAAGACA     | CTCCCTTTCTTACCTCCCCA     |
| <i>ACO2</i>                   | AATGGATGTACTCGTTGGGC    | ACAGCCTACTGGTGACTCGG     |
| <i>IDH2</i>                   | AACCGTGACCAGACTGATGAC   | ATGGTGGCACACTTGACAGC     |
| <i>OGDH</i>                   | TTGGCTGAAAACCCCAAAAG    | TGTGCTTCTACCAGGGACTGT    |
| <i>SUCLA2</i>                 | TTGCTTCAGGAGACTCAGCA    | GTGAGCGAAAATATCCCAGG     |
| <i>SHDA</i>                   | CGAACGTCTTCAGGTGCTTT    | AAGAACATCGGAACTGCGAC     |
| <i>SHDB</i>                   | CACAGATGCCTTCTCTGCAT    | AAGGCTGGAGACAAACCTCA     |
| <i>FH</i>                     | CCTCATCTGCTGCCTTCATT    | GGAGGTGTGACAGAACGCAT     |
| <i>MDH2</i>                   | TCGGCCCAGAACAATGCTAAA   | GCGGCTTTGGTCTCGATGT      |
| <i>ACTB</i>                   | GGATGCAGAAGGAGATCACT    | CGATCCACACGGAGTACTTG     |
| <i>FNI</i>                    | ACCTCGGTGTTGTAAGGTGG    | CCATAAAGGGCAACCAAGAG     |
| <b>Primers for Mouse gene</b> |                         |                          |
| <i>Il1b</i>                   | GAAATGCCACCTTTTGACAGTG  | TGGATGCTCTCATCAGGACAG    |
| <i>Il6</i>                    | TGGAGTCACAGAAGGAGTGGCT  | GCATAACGCACTAGGTTTGCCG   |
| <i>Il12a</i>                  | TTCCTGCACTGCTGAAGACATC  | CAAGGCACAGGGTCATCATCAA   |
| <i>Tnf</i>                    | CCTGTAGCCCACGTCGTAG     | GGGAGTAGACAAGGTACAACCC   |
| <i>Hk2</i>                    | ATGATCGCCTGCTTATTCACG   | CGCCTAGAAATCTCCAGAAGGG   |
| <i>Pfkfb3</i>                 | ACGAAGATGCCGTTGGAAC     | TCGACGGGCACCCAGAT        |
| <i>Pkm</i>                    | TTGACTCTGCCCCATCAC      | GCAGGCCCAATGGTACAAAT     |
| <i>Actb</i>                   | ACACCCGCCACCAGTTCGC     | ATGGGGTACTTCAGGGTCAGGATA |
| <b>Primers for si and sh</b>  |                         |                          |
| siPKM2                        | CCUGUAUGUCAUAAACAACA    | UUGUUUAUUGACAUAACAGGUA   |
| shFN1                         | GGTTGTTATGACAATGGAA     | TTCCATTGTCATAACAACC      |
| shFn1                         | CTGGACCTGTCCAAGTAATTA   | TAATTACTTGGACAGGTCCAG    |

**Table S5.** Recombinant proteins, peptides, chemicals, and critical commercial assays

| <b>Name</b>                                            | <b>Supplier</b> | <b>Identifier</b>               |
|--------------------------------------------------------|-----------------|---------------------------------|
| <b>Recombinant proteins, peptides</b>                  |                 |                                 |
| Human IL-1 beta/IL-1F2 antibody                        | R&D Systems     | Cat# MAB601; RRID:AB_358545     |
| Human IL-6 antibody, Clone 6708                        | R&D Systems     | Cat# MAB206; RRID:AB_2127617    |
| Human IL-12p70 antibody (24910)                        | R&D Systems     | Cat# MAB219; RRID:AB_2123616    |
| Human TNF-alpha antibody, Clone 28401                  | R&D Systems     | Cat# MAB610; RRID:AB_2203945    |
| Human TLR4 Affinity Purified antibody                  | R&D Systems     | Cat# AF1478; RRID:AB_354816     |
| Human CD274 (PD-L1) Antibody (MIH1)                    | eBioscience     | Cat# 14-5983-82; RRID:AB_467784 |
| InVivoMab anti-mouse PD-L1 (B7-H1)                     | Bio X Cell      | Cat# BE0101; RRID:AB_10949073   |
| nVivoMab anti-mouse/rat IL-1 $\beta$ antibody          | Bio X Cell      | Cat# BE0246; RRID:AB_2687727    |
| InVivoMab anti-mouse/rat/rabbit TNF- $\alpha$ antibody | Bio X Cell      | Cat# BE0244; RRID:AB_2687725    |
| Recombinant Human IL-1 beta/IL-1F2 Protein             | R&D Systems     | Cat# 201-LB-010                 |
| Recombinant Human IL-6 Protein                         | R&D Systems     | Cat# 206-IL-010                 |
| Recombinant Human IL-12 Protein                        | R&D Systems     | Cat# 219-IL-025                 |
| Recombinant Human TNF-alpha Protein                    | R&D Systems     | Cat# 210-TA-020                 |
| Human Fibronectin Protein                              | R&D Systems     | Cat# 1918-FN                    |
| <b>Chemicals</b>                                       |                 |                                 |
| 2-DG                                                   | Sigma-Aldrich   | Cat# D8375 CAS: 154-17-6        |
| 2-NBDG                                                 | Sigma-Aldrich   | Cat# 72987 CAS: 186689-07-6     |
| 3-BP                                                   | Sigma-Aldrich   | Cat# 376817 CAS: 1113-59-3      |
| 3-PO                                                   | Merck Millipore | Cat# 525330 CAS: 18550-98-6     |
| Etomoxir                                               | Sigma-Aldrich   | Cat# 236020 CAS: 828934-41-4    |
| $\alpha$ -KG                                           | Sigma-Aldrich   | Cat# K2010 CAS: 22202-68-2      |

| <b>Chemicals</b>                                   |                     |                              |
|----------------------------------------------------|---------------------|------------------------------|
| ML-265                                             | Cayman Chemical     | Cat# 13942 CAS: 1221186-53-3 |
| Oligomycin                                         | Sigma-Aldrich       | Cat# 495455 CAS: 1404-19-9   |
| Propidium iodide                                   | Sigma-Aldrich       | Cat# P4170 CAS: 25535-16-4   |
| WP1066                                             | Sigma-Aldrich       | Cat# 573097 CAS: 857064-38-1 |
| <b>Critical commercial assays</b>                  |                     |                              |
| IL-1 $\beta$ Human Uncoated ELISA kit              | eBioscience         | Cat# 88-7349                 |
| IL-6 Human Uncoated ELISA Kit                      | eBioscience         | Cat# 88-7066                 |
| IL-12 p70 Human Uncoated ELISA kit                 | eBioscience         | Cat# 88-7126                 |
| TNF- $\alpha$ Human Uncoated ELISA Kit             | eBioscience         | Cat# 88-7347                 |
| Human Fibronectin Platinum ELISA 10 x 96 tests Kit | Invitrogen          | Cat# BMS2028TEN              |
| Human IFN- $\gamma$ ELISPOT Pair                   | BD Biosciences      | Cat# 551873                  |
| IntraPrep reagent                                  | Beckman Coulter     | Cat# A07803                  |
| Hieff qPCR SYBR Green Master Mix                   | Yeasen              | Cat# 11201ES03               |
| Leukocyte Activation Cocktail                      | BD Biosciences      | Cat# 550583                  |
| L-Lactate Assay Kit I -200 Assays                  | Eton bioscience     | Cat# 1200012002              |
| Trizol Reagent                                     | Life Techonology    | Cat# AM9738                  |
| XF Glycolysis Stress Test kit                      | Seahorse Bioscience | Cat# 102194-100              |
| 5X All-In-One RT MasterMix                         | abm                 | Cat# G492                    |

**Table S6.** Association of tumor PKM2<sup>+</sup> CD68<sup>+</sup> cells with clinicopathological characteristics

| Variables             |          | Tumor PKM2 <sup>+</sup> CD68 <sup>+</sup> cells |     |                |
|-----------------------|----------|-------------------------------------------------|-----|----------------|
|                       |          | High                                            | Low | <i>p</i> value |
| Age, years            | ≤ 51     | 28                                              | 28  | 0.895          |
|                       | > 51     | 17                                              | 18  |                |
| Gender                | Male     | 38                                              | 38  | 0.814          |
|                       | Female   | 7                                               | 8   |                |
| HBsAg                 | Negative | 8                                               | 6   | 0.531          |
|                       | Positive | 37                                              | 40  |                |
| Cirrhosis             | Absent   | 7                                               | 17  | <b>0.021</b>   |
|                       | Present  | 38                                              | 29  |                |
| ALT, U/L              | ≤ 40     | 23                                              | 21  | 0.602          |
|                       | > 40     | 22                                              | 25  |                |
| AFP, ng/ml            | ≤ 25     | 24                                              | 19  | 0.250          |
|                       | > 25     | 21                                              | 27  |                |
| Tumor size, cm        | ≤ 5      | 14                                              | 23  | <b>0.045</b>   |
|                       | > 5      | 32                                              | 22  |                |
| Tumor multiplicity    | Solitary | 35                                              | 36  | 0.956          |
|                       | Multiple | 10                                              | 10  |                |
| Vascular invasion     | Absent   | 35                                              | 28  | 0.081          |
|                       | Present  | 10                                              | 18  |                |
| TNM stage             | I+II     | 15                                              | 28  | <b>0.009</b>   |
|                       | III+IV   | 30                                              | 18  |                |
| Tumor differentiation | I+II     | 31                                              | 31  | 0.878          |
|                       | III+IV   | 14                                              | 15  |                |
| Fibrous capsule       | Absent   | 15                                              | 20  | 0.320          |
|                       | Present  | 30                                              | 26  |                |

**Abbreviations:** HbsAg, hepatitis B surface antigen; ALT, alanine aminotransferase; AFP,  $\alpha$ -fetoprotein; TNM, tumor-node-metastasis.

**Table S7.** Univariate and multivariate analysis of factors associated with disease-free survival of HCC patients

| Variables                                       | DFS            |     |          |              |              |              |                |
|-------------------------------------------------|----------------|-----|----------|--------------|--------------|--------------|----------------|
|                                                 | Univariate     |     |          |              | Multivariate |              |                |
|                                                 | <i>p</i> value |     |          |              | HR           | 95%CI of HR  | <i>p</i> value |
| Age, years                                      | > 51           | vs. | ≤ 51     | 0.118        |              |              |                |
| Gender                                          | female         | vs. | male     | 0.246        |              |              |                |
| HBsAg                                           | positive       | vs. | negative | 0.171        |              |              |                |
| Cirrhosis                                       | present        | vs. | absent   | 0.227        |              |              |                |
| ALT, U/L                                        | > 40           | vs. | ≤ 40     | 0.242        |              |              |                |
| AFP, ng/ml                                      | > 25           | vs. | ≤ 25     | 0.051        |              |              |                |
| Tumor size, cm                                  | > 5            | vs. | ≤ 5      | 0.071        |              |              |                |
| Tumor multiplicity                              | multiple       | vs. | solitary | 0.076        |              |              |                |
| Vascular invasion                               | present        | vs. | absent   | <b>0.004</b> | 2.014        | 1.073–3.781  | <b>0.029</b>   |
| TNM stage                                       | III+IV         | vs. | I+II     | <b>0.001</b> | 5.395        | 2.583–11.270 | <b>0.001</b>   |
| Tumor differentiation                           | III+IV         | vs. | I+II     | <b>0.004</b> | 0.349        | 0.194–0.628  | <b>0.032</b>   |
| Fibrous capsule                                 | present        | vs. | absent   | 0.535        |              |              |                |
| Tumor PKM2 <sup>+</sup> CD68 <sup>+</sup> cells | high           | vs. | low      | <b>0.019</b> | 1.823        | 1.005–3.308  | <b>0.048</b>   |

**Abbreviations:** HBsAg, hepatitis B surface antigen; ALT, alanine aminotransferase; AFP,  $\alpha$ -fetoprotein; TNM, tumor-node-metastasis; N/A, not applicable.

## Figure S1

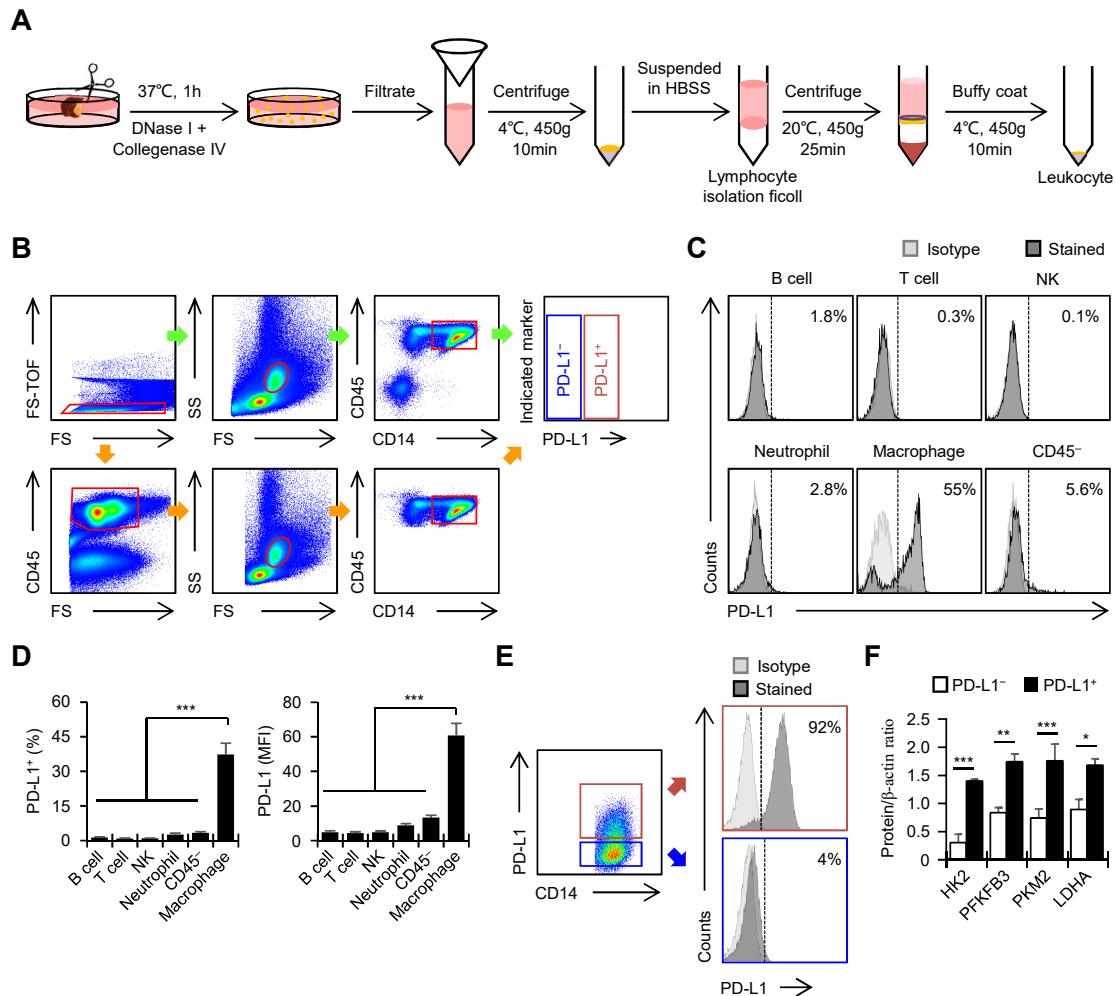

**Figure S1. The expression of PD-L1 in human HCC tumors are mainly in macrophages.** (A) Procedures for preparing single-cell leukocyte suspensions from human HCC tissues. (B) Representative plots of cells isolated from blood and tumor tissues showing that mononuclear cells from samples were first gated for singlets (FS-TOF vs. FS) and myeloid cells (SS vs. FS; green arrows), or alternatively, they were first gated for singlets (FS-TOF vs. FS) and leukocytes (CD45 vs. FS) then myeloid cells (SS vs. FS; orange arrows). Thereafter, the CD45<sup>+</sup>CD14<sup>+</sup> macrophages were further divided into PD-L1<sup>-</sup> and PD-L1<sup>+</sup> subsets. (C and D) FACS analysis of PD-L1 expression on B cells (CD19<sup>+</sup>), T cells (CD3<sup>+</sup>CD56<sup>-</sup>), NK cells (CD56<sup>+</sup>CD3<sup>-</sup>), neutrophils (CD15<sup>+</sup>), monocytes/macrophages (CD14<sup>+</sup>), and CD45<sup>-</sup> non-hematopoietic cells isolated from HCC tumors (n=6). (E) Gating strategy for FACS sorting. PD-L1<sup>-</sup> and PD-L1<sup>+</sup> subsets were sorted according to patterns of PD-L1 expression. (F) Expression of key glycolytic enzymes gene in PD-L1<sup>+</sup> and PD-L1<sup>-</sup> macrophages purified from human HCC tumors (n=3).



## Figure S2

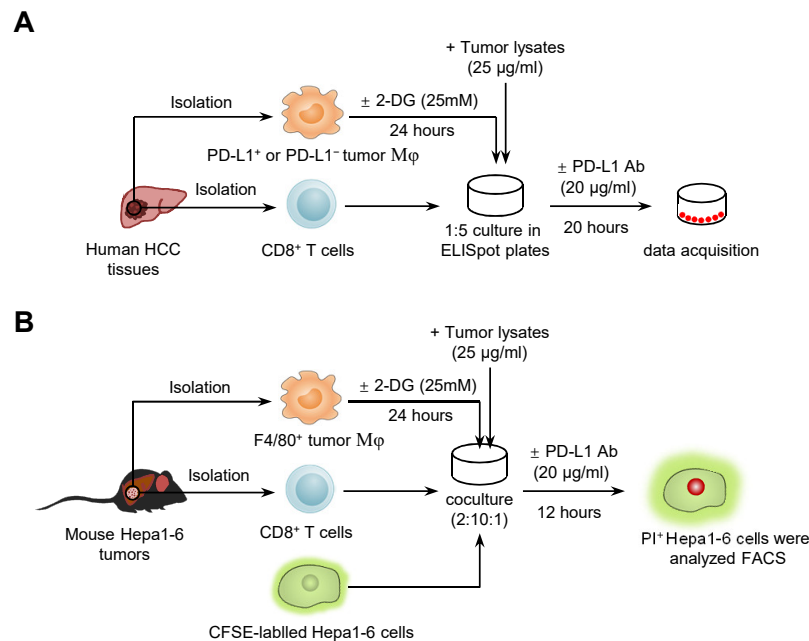

**Figure S2. The effect of PD-L1 blockade and glycolysis inhibition on tumor macrophages -elicited cytotoxic T cell function. (A)** Schematic procedures for Figure 2A. IFN- $\gamma$  detection by ELISpot in HCC tumor-derived T cells cultured alone or with PD-L1<sup>-</sup> or PD-L1<sup>+</sup> macrophages (M $\phi$ ), or with those cells pre-treated with 2-DG, anti-PD-L1 antibody, or IgG1 (n=5). **(B)** Schematic procedures for Figure 2B. Cytotoxic effects of tumor T cells on CFSE-labelled autologous mouse Hepa1-6 hepatoma cells in the presence or absence of tumor M $\phi$  that were left untreated or pre-treated with 2-DG, anti-PD-L1 antibody, or IgG1 (n=6). Propidium iodide<sup>+</sup> apoptotic tumor cells were measured by FACS.

## Figure S3

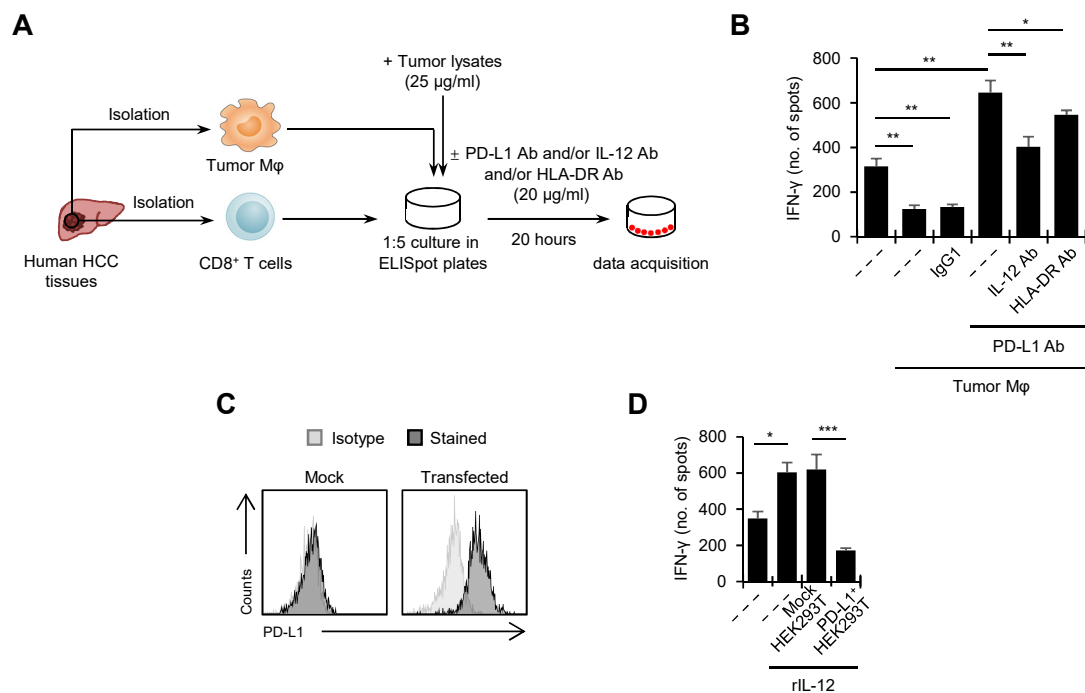

**Figure S3. The effect of IL-12 or HLA-DR on tumor macrophages-elicited cytotoxic T cell function upon PD-L1 blockade. (A and B)** Macrophages (Mφ) from human HCC tumors were cultured with autologous tumor-derived CD8<sup>+</sup> T cells for 20 hours in the presence or absence of an anti-PD-L1 antibody, and/or anti-IL-12 antibody, and/or anti-HLA-DR antibody. Meanwhile, 25 µg/ml of tumor mass lysates were added to trigger tumor specific T cell response (A). IFN-γ production in CD8<sup>+</sup> T cells was analyzed by ELISpot (B). (C) Efficiency of PD-L1 over-expression in Huh7 cells (n=3). (D) IFN-γ detection by ELISpot in HCC tumor-derived T cells cultured alone or with Mock or PD-L1 HEK293T transfectants in the presence or absence human recombinant IL-12 antibody (n=5). Results represent mean ± SEM of four independent experiments (n=5). \*P<0.05, \*\*P<0.01, \*\*\*P<0.001, one-way ANOVA followed by Bonferroni's correction.

## Figure S4

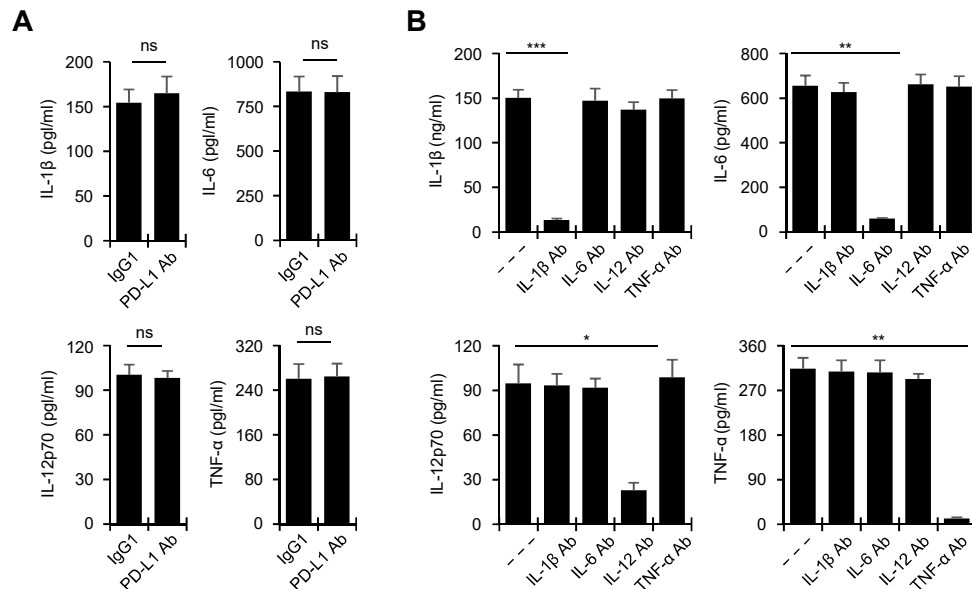

**Figure S4. Blocking the PD-L1 in PD-L1<sup>+</sup> macrophages did not affect the production of proinflammatory cytokines.** (A) Effects of PD-L1 blocking antibody on proinflammatory cytokines expression in macrophages isolated from human HCC tumors (n=4). (B) Macrophages from human HCC tumors were treated with indicated neutralizing antibodies or isotype IgG for 24 hours. IL-1 $\beta$ , IL-6, IL-12, and TNF- $\alpha$  production were determined by ELISA (n=5). Results represent mean  $\pm$  SEM of four independent experiments. \*P<0.05, \*\*P<0.01, \*\*\*P<0.001, one-way ANOVA followed by Bonferroni's correction.

## Figure S5

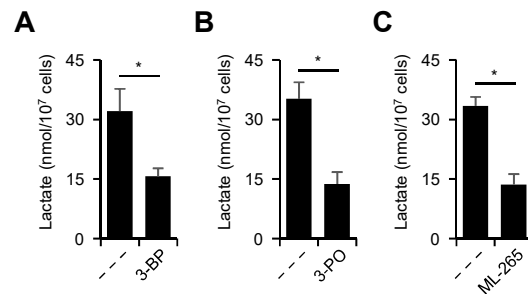

**Figure S5. Effects of key glycolytic inhibitors on lactate production.** (A-C) CD14<sup>+</sup> cells purified from peripheral blood of HCC patients were treated with supernatant from primary HCC cells (HCC-SN) in the absence or presence of 3-BP (A), 3-PO (B), or ML-265 (C) for 24 hours (n=7). Lactate production was measured with a lactate assay kit. Results represent mean  $\pm$  SEM of four independent experiments. \*P<0.05, Student's t-test.

## Figure S6

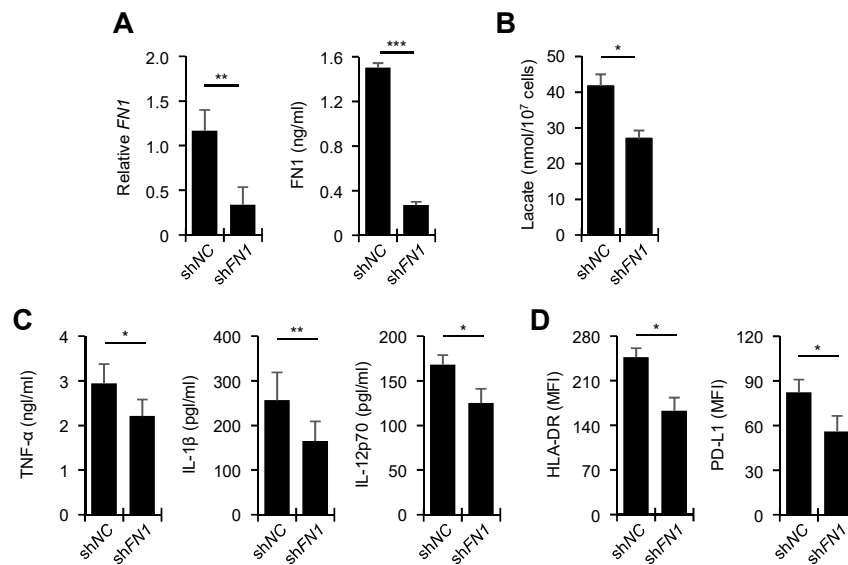

**Figure S6. FN1-knockdown cells showed impaired ability to induce PD-L1 expression in monocytes. (A-D)** Knock-down of *FN1* (A) in Huh7 cells suppressed lactate production (B), inflammatory cytokine expression (C), as well as HLA-DR and PD-L1 expression (D), in Huh7 culture supernatants treated monocytes (each n=4). Results are expressed as the mean ± SEM. \*P<0.05, \*\*P<0.01, \*\*\*P<0.001.
